# Supplementary material for: Broad Metabolome Alterations Associated with the Intake of Oral Contraceptives Are Mediated by Cortisol in Premenopausal Women
Source: PubMed Central journal article supplement (PMC8064380; doi:10.3390/metabo11040193), 2021-03-24
Supplement: metabolites-11-00193-s001.pdf [file metabolites-11-00193-s001.pdf]

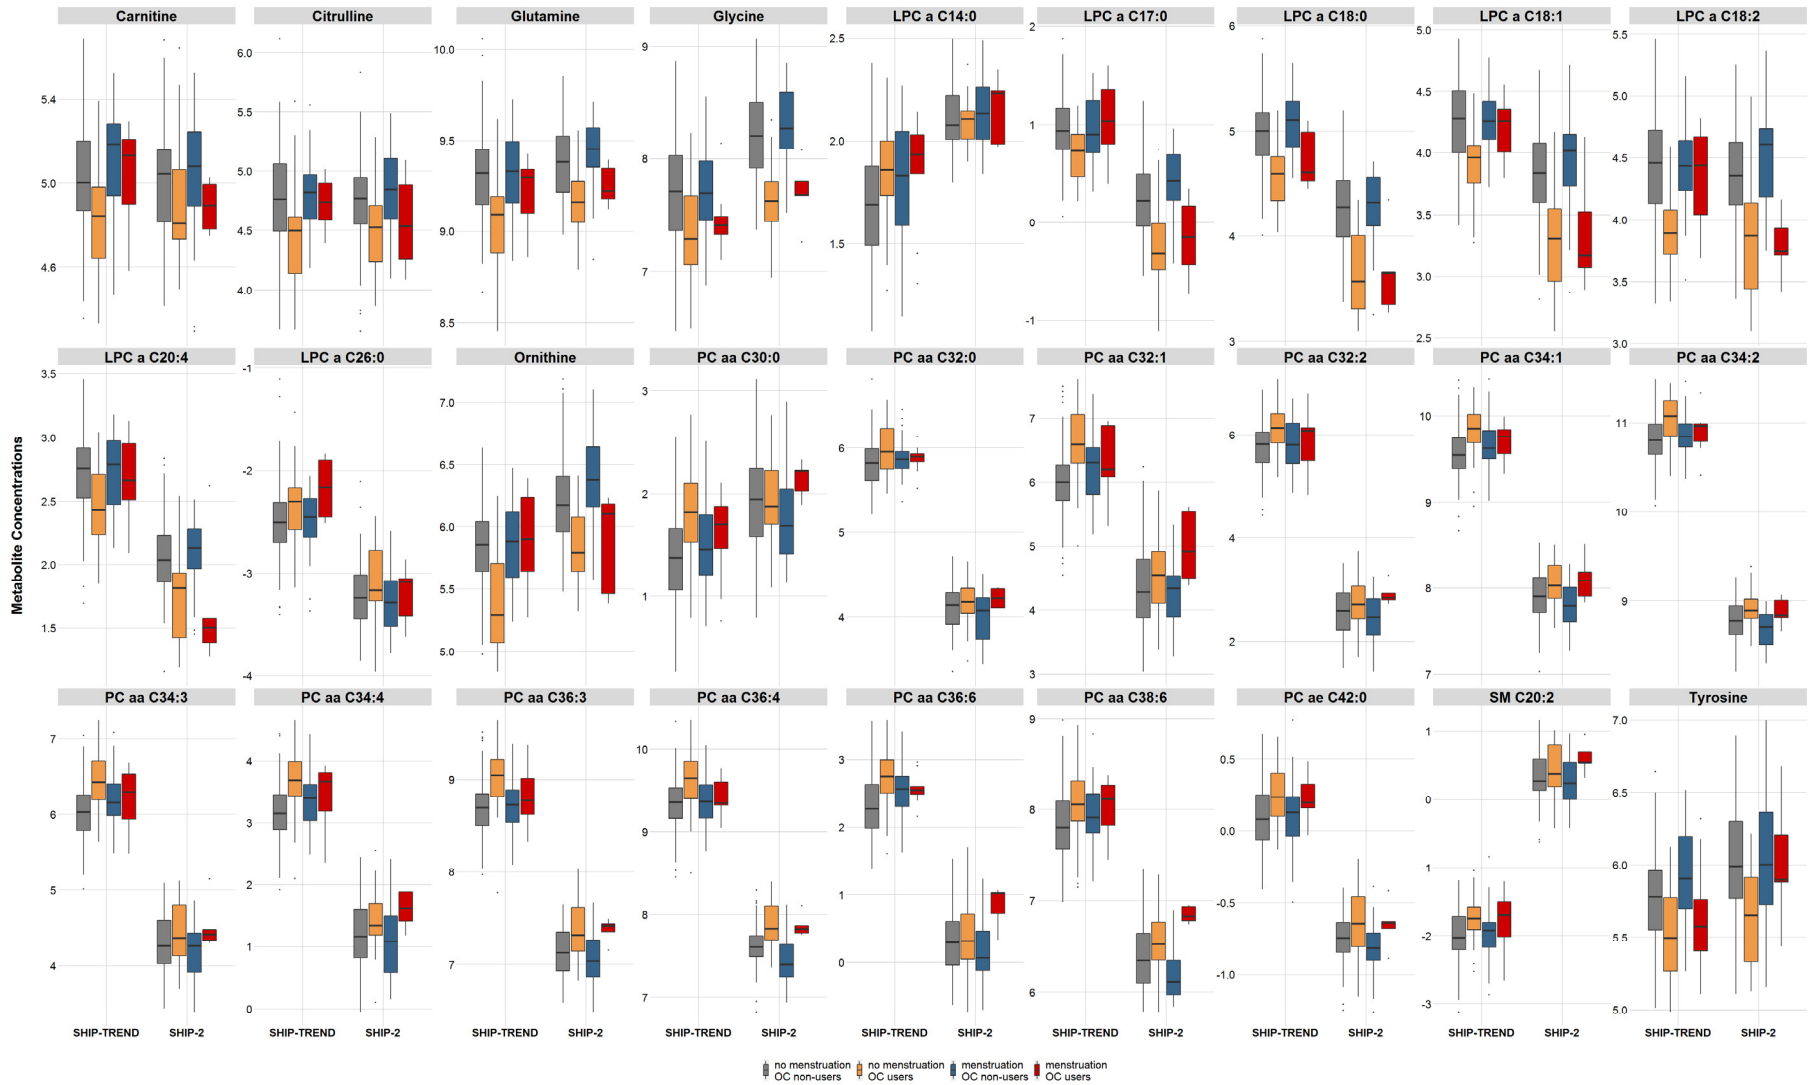

**Figure S1.** Boxplots are presented with the bold line symbolizing median serum cortisol concentrations and boxes summarizing the interquartile range. Whiskers are presenting concentrations lower than 25% and higher than 75%, respectively. Dots are representing statistical outliers ( $M \pm 3SD$ ). Metabolite concentrations dependent on menstrual bleeding at the time of assessment and OC use are presented in both cohorts. Metabolites are presented if the effect of OC use was Bonferroni-corrected significant (171 tests:  $p < 2.924 \times 10^{-4}$ ) in SHIP-TREND.

**Table S1:** Distribution of the oral contraceptive compounds in SHIP-TREND.

| Active Ingredient        | Dosage (mg)       |              | N     | %   |      |
|--------------------------|-------------------|--------------|-------|-----|------|
|                          | Ethinylestradiol  | Progesterone |       |     |      |
| <b>SINGLE COMPOUND</b>   |                   |              |       |     |      |
|                          | Desogestrel       | 0.075        | 3     | 4.1 |      |
| <b>COMBINED COMPOUND</b> |                   |              |       |     |      |
| <i>Monophasic</i>        |                   |              |       |     |      |
| Ethinylestradiol         | Norgestimate      | 0.035        | 0.25  | 3   | 4.1  |
|                          | Drospirenone      | 0.02         | 3     | 4   | 5.5  |
|                          |                   | 0.03         | 3     | 3   | 4.1  |
|                          | Dienogest         | 0.03         | 2     | 15  | 20.5 |
|                          | Levonorgestrel    | 0.02         | 0.1   | 4   | 5.5  |
|                          |                   | 0.03         | 0.125 | 8   | 11.0 |
|                          |                   | 0.03         | 0.15  | 4   | 5.5  |
|                          |                   | 0.05         | 0.125 | 2   | 2.7  |
|                          | Desogestrel       | 0.02         | 0.15  | 10  | 13.7 |
|                          |                   | 0.03         | 0.15  | 2   | 2.7  |
|                          | Chlormadinonaceta | 0.03         | 2     | 3   | 4.1  |
| <i>Triphasic</i>         |                   |              |       |     |      |
| Ethinylestradiol         | Levonorgestrel    | 0.03         | 0.125 | 11  | 15.1 |
|                          | Desogestrel       | 0.035        | 0.05  | 1   | 1.4  |

\*as specified in column three

**Table S2:** Distribution of the oral contraceptive compounds in SHIP-2.

| Active Ingredient        | Dosage (mg)        |              | N     | %   |      |
|--------------------------|--------------------|--------------|-------|-----|------|
|                          | Ethinylestradio    | Progesterone |       |     |      |
| <b>SINGLE COMPOUND</b>   |                    |              |       |     |      |
|                          | Desogestrel        | 0.075        | 1     | 2.3 |      |
| <b>COMBINED COMPOUND</b> |                    |              |       |     |      |
| <i>Monophasic</i>        |                    |              |       |     |      |
| Ethinylestradiol         | Drospirenone       | 0.02         | 3     | 1   | 5    |
|                          |                    | 0.03         | 3     | 3   | 7.0  |
|                          | Dienogest          | 0.03         | 2     | 5   | 11.6 |
|                          | Levonorgestrel     | 0.02         | 0.1   | 1   | 2.3  |
|                          |                    | 0.03         | 0.125 | 8   | 18.6 |
|                          |                    | 0.03         | 0.15  | 6   | 14.0 |
|                          | Desogestrel        | 0.02         | 0.15  | 6   | 14.0 |
|                          |                    | 0.03         | 0.15  | 2   | 4.7  |
|                          | Chlormadinonaceta  | 0.03         | 2     | 1   | 2.3  |
| <i>Step-up-pill</i>      |                    |              |       |     |      |
| Ethinylestradiol         | Chlormadininacetat | 0.05         | 1     | 2   | 4.7  |
| <i>Triphasic</i>         |                    |              |       |     |      |
| Ethinylestradiol         | Levonorgestrel     | 0.03         | 0.05  | 5   | 11.6 |
|                          | Norethisteron      | 0.035        | 1     | 1   | 2.3  |

Norgestimat

0.035

0.18

1

2.3

\*as specified in column three

Table S3: Technical descriptive statistics for the analyzed metabolites in SHIP-TREND and SHIP-2.

|                                        | SHIP-TREND  |                 | CV    | SHIP-2      |                 |
|----------------------------------------|-------------|-----------------|-------|-------------|-----------------|
|                                        | % above LOD | p-value fasting |       | % above LOD | p-value fasting |
| <b>Carnitine</b>                       | 99.14       | 0.950           | 6.55  | 100.00      | 0.950           |
| <b>Propionylcarnitine</b>              | 98.28       | 0.995           | 5.92  | 100.00      | 0.995           |
| <b>Hydroxybutyrylcarnitine</b>         | 98.71       | 0.147           | 15.58 | 98.11       | 0.147           |
| <b>Hydroxypropionylcarnitine</b>       | 98.71       | 0.476           | 15.13 | 98.74       | 0.476           |
| <b>Propenoylcarnitine</b>              | 99.57       | 0.691           | 15.29 | 98.74       | 0.691           |
| <b>Butyrylcarnitine</b>                | 99.14       | 0.268           | 8.01  | 99.37       | 0.268           |
| <b>Butenylcarnitine</b>                | 99.14       | 0.748           | 16.70 | 99.37       | 0.748           |
| <b>Glutaryl carnitine</b>              | 99.14       | 0.296           | 21.14 | 99.37       | 0.296           |
| <b>Methylglutaryl carnitine</b>        | 99.14       | 0.898           | 11.23 | 99.37       | 0.898           |
| <b>Hydroxyvalerylcarnitine</b>         | 97.84       | 0.936           | 9.38  | 98.74       | 0.936           |
| <b>Tiglylcarnitine</b>                 | 99.57       | 0.898           | 8.96  | 96.86       | 0.898           |
| <b>Glutaconylcarnitine</b>             | 99.14       | 0.650           | 13.67 | 99.37       | 0.650           |
| <b>Pimelylcarnitine</b>                | 100.00      | 0.252           | 11.04 | 100.00      | 0.252           |
| <b>Octanoylcarnitine</b>               | 98.71       | 0.743           | 10.56 | 100.00      | 0.743           |
| <b>Nonaylcarnitine</b>                 | 99.14       | 0.945           | 9.66  | 99.37       | 0.945           |
| <b>Decanoylcarnitine</b>               | 99.57       | 0.311           | 14.77 | 100.00      | 0.311           |
| <b>Decenoylcarnitine</b>               | 99.57       | 0.499           | 8.62  | 98.74       | 0.499           |
| <b>Decadienylcarnitine</b>             | 99.14       | 0.667           | 8.88  | 100.00      | 0.667           |
| <b>Dodecanoylcarnitine</b>             | 98.71       | 0.256           | 9.19  | 100.00      | 0.256           |
| <b>Dodecanedioylcarnitine</b>          | 99.14       | 0.809           | 7.74  | 99.37       | 0.809           |
| <b>Dodecenoylcarnitine</b>             | 99.57       | 0.060           | 6.59  | 100.00      | 0.060           |
| <b>Tetradecanoylcarnitine</b>          | 98.28       | 0.170           | 22.48 | 99.37       | 0.170           |
| <b>Tetradecenoylcarnitine</b>          | 99.57       | 0.047           | 15.53 | 99.37       | 0.047           |
| <b>Hydroxytetradecenoylcarnitine</b>   | 99.57       | 0.861           | 18.33 | 98.74       | 0.861           |
| <b>Tetradecadienylcarnitine</b>        | 100.00      | 0.081           | 15.21 | 99.37       | 0.081           |
| <b>Hydroxytetradecadienylcarnitine</b> | 99.57       | 0.747           | 24.66 | 100.00      | 0.747           |
| <b>Hexadecanoylcarnitine</b>           | 98.71       | 0.155           | 9.02  | 99.37       | 0.155           |
| <b>Hydroxyhexadecanoylcarnitine</b>    | 98.71       | 0.174           | 19.69 | 100.00      | 0.174           |
| <b>Hexadecenoylcarnitine</b>           | 100.00      | 0.059           | 14.71 | 100.00      | 0.059           |
| <b>Hydroxyhexadecenoylcarnitine</b>    | 99.57       | 0.946           | 22.46 | 97.48       | 0.946           |
| <b>Hexadecadienylcarnitine</b>         | 99.14       | 0.504           | 23.66 | 98.74       | 0.504           |
| <b>Octadecanoylcarnitine</b>           | 98.71       | 0.278           | 16.95 | 100.00      | 0.278           |
| <b>Octadecenoylcarnitine</b>           | 99.14       | 0.004           | 9.43  | 100.00      | 0.004           |
| <b>Hydroxyoctadecenoylcarnitine</b>    | 99.14       | 0.402           | 18.59 | 100.00      | 0.402           |
| <b>Octadecadienylcarnitine</b>         | 100.00      | 0.047           | 18.16 | 98.74       | 0.047           |

% above LOD = % above limit of detection, fasting = p-value of non-linear associations with fasting time (restricted cubic splines); CV = coefficient of variance

Note: CVs were not available for SHIP-TREND as no technical samples were measured for replication.

**Table S1 - continued:** Technical descriptive statistics for the analyzed metabolites in SHIP-TREND and SHIP-2

|                        | SHIP-TREND                         |                 | CV    | SHIP-2      |                 |       |
|------------------------|------------------------------------|-----------------|-------|-------------|-----------------|-------|
|                        | % above LOD                        | p-value fasting |       | % above LOD | p-value fasting |       |
| <b>Amino Acids</b>     | <b>Alanine</b>                     | 99.14           | 0.648 | 5.13        | 100.00          | 0.648 |
|                        | <b>Arginine</b>                    | 97.84           | 0.336 | 6.65        | 100.00          | 0.336 |
|                        | <b>Asparagine</b>                  | 97.41           | 0.829 | 4.48        | 100.00          | 0.829 |
|                        | <b>Aspartate</b>                   | 98.28           | 0.312 | 11.92       | 94.97           | 0.312 |
|                        | <b>Citrulline</b>                  | 97.84           | 0.040 | 4.14        | 100.00          | 0.040 |
|                        | <b>Glutamine</b>                   | 98.28           | 0.945 | 7.99        | 98.74           | 0.945 |
|                        | <b>Glutamate</b>                   | 99.14           | 0.257 | 6.55        | 98.74           | 0.257 |
|                        | <b>Glycine</b>                     | 99.14           | 0.656 | 5.91        | 99.37           | 0.656 |
|                        | <b>Histidine</b>                   | 98.28           | 0.385 | 6.08        | 98.11           | 0.385 |
|                        | <b>Isoleucine</b>                  | 99.14           | 0.079 | 5.22        | 100.00          | 0.079 |
|                        | <b>Leucine</b>                     | 99.14           | 0.444 | 5.49        | 100.00          | 0.444 |
|                        | <b>Lysine</b>                      | 97.84           | 0.153 | 7.79        | 100.00          | 0.153 |
|                        | <b>Methionine</b>                  | 99.14           | 0.050 | 7.46        | 100.00          | 0.050 |
|                        | <b>Ornithine</b>                   | 97.41           | 0.916 | 8.64        | 97.48           | 0.916 |
|                        | <b>Phenylalanine</b>               | 98.71           | 0.625 | 5.75        | 100.00          | 0.625 |
|                        | <b>Proline</b>                     | 99.14           | 0.724 | 5.89        | 98.11           | 0.724 |
|                        | <b>Serine</b>                      | 98.28           | 0.932 | 7.16        | 99.37           | 0.932 |
|                        | <b>Threonine</b>                   | 98.28           | 0.027 | 4.45        | 100.00          | 0.027 |
|                        | <b>Tryptophan</b>                  | 99.14           | 0.004 | 5.38        | 99.37           | 0.004 |
|                        | <b>Tyrosine</b>                    | 98.28           | 0.914 | 5.27        | 98.11           | 0.914 |
| <b>Valine</b>          | 99.57                              | 0.280           | 5.48  | 99.37       | 0.280           |       |
| <b>Biogenic Amines</b> | <b>Acetyloronithine</b>            | 98.28           | 0.212 | 8.80        | 96.86           | 0.212 |
|                        | <b>Asymmetric dimethylarginine</b> | 86.64           | 0.684 | 8.79        | 99.37           | 0.684 |
|                        | <b>Alpha-amino adipic acid</b>     | 91.81           | 0.442 | 14.95       | 96.23           | 0.442 |
|                        | <b>Creatinine</b>                  | 99.57           | 0.390 | 3.00        | 99.37           | 0.390 |
|                        | <b>Kynurenine</b>                  | 98.71           | 0.416 | 8.03        | 100.00          | 0.416 |
|                        | <b>Methioninesulfoxide</b>         | 95.69           | 0.475 | 8.21        | 97.48           | 0.475 |
|                        | <b>Serotonin</b>                   | 87.93           | 0.968 | 9.10        | 95.60           | 0.968 |
|                        | <b>Spermidine</b>                  | 94.40           | 0.969 | 3.64        | 99.37           | 0.969 |
|                        | <b>Spermine</b>                    | 86.21           | 0.100 | 7.56        | 97.48           | 0.100 |
|                        | <b>Hydroxyproline</b>              | 99.14           | 0.139 | 6.08        | 91.19           | 0.139 |
|                        | <b>Taurine</b>                     | 98.71           | 0.423 | 3.32        | 99.37           | 0.423 |
|                        | <b>Total dimethylarginine</b>      | 94.40           | 0.633 | 5.07        | 99.37           | 0.633 |

% above LOD = % above limit of detection, fasting = p-value of non-linear associations with fasting time (restricted cubic splines); CV = coefficient of variance

Note: CVs were not available for SHIP-TREND as no technical samples were measured for replication.

**Table S1 - continued:** Technical descriptive statistics for the analyzed metabolites in SHIP-TREND and SHIP-2

|                          | SHIP-TREND           |                    | SHIP-2 |             |                 |       |
|--------------------------|----------------------|--------------------|--------|-------------|-----------------|-------|
|                          | % above LOD          | p-value fasting    | CV     | % above LOD | p-value fasting |       |
| <b>Lysophospholipids</b> | <b>LPC a C14:0</b>   | 99.57              | 0.269  | 6.72        | 99.37           | 0.269 |
|                          | <b>LPC a C16:0</b>   | 99.57              | 0.345  | 6.86        | 100.00          | 0.345 |
|                          | <b>LPC a C16:1</b>   | 100.00             | 0.944  | 6.23        | 99.37           | 0.944 |
|                          | <b>LPC a C17:0</b>   | 99.57              | 0.833  | 7.08        | 99.37           | 0.833 |
|                          | <b>LPC a C18:0</b>   | 98.28              | 0.243  | 7.26        | 97.48           | 0.243 |
|                          | <b>LPC a C18:1</b>   | 99.57              | 0.864  | 6.88        | 100.00          | 0.864 |
|                          | <b>LPC a C18:2</b>   | 99.57              | 0.552  | 6.76        | 100.00          | 0.552 |
|                          | <b>LPC a C20:3</b>   | 98.71              | 0.824  | 6.23        | 100.00          | 0.824 |
|                          | <b>LPC a C20:4</b>   | 99.57              | 0.202  | 5.76        | 100.00          | 0.202 |
|                          | <b>LPC a C24:0</b>   | 98.71              | 0.033  | 12.52       | 100.00          | 0.033 |
|                          | <b>LPC a C26:0</b>   | 99.14              | 0.053  | 14.20       | 100.00          | 0.053 |
|                          | <b>LPC a C26:1</b>   | 100.00             | 0.077  | 12.02       | 100.00          | 0.077 |
|                          | <b>LPC a C28:0</b>   | 99.14              | 0.025  | 12.71       | 100.00          | 0.025 |
|                          | <b>LPC a C28:1</b>   | 100.00             | 0.573  | 8.34        | 100.00          | 0.573 |
|                          | <b>Phospholipids</b> | <b>PC aa C24:0</b> | 98.28  | 0.367       | 11.96           | 98.11 |
| <b>PC aa C26:0</b>       |                      | 98.71              | 0.032  | 5.79        | 100.00          | 0.032 |
| <b>PC aa C28:1</b>       |                      | 100.00             | 0.473  | 6.07        | 100.00          | 0.473 |
| <b>PC aa C30:0</b>       |                      | 99.57              | 0.111  | 5.53        | 100.00          | 0.111 |
| <b>PC aa C32:0</b>       |                      | 99.14              | 0.383  | 4.44        | 100.00          | 0.383 |
| <b>PC aa C32:1</b>       |                      | 98.71              | 0.498  | 4.75        | 100.00          | 0.498 |
| <b>PC aa C32:2</b>       |                      | 99.57              | 0.072  | 4.99        | 99.37           | 0.072 |
| <b>PC aa C32:3</b>       |                      | 99.14              | 0.923  | 6.27        | 100.00          | 0.923 |
| <b>PC aa C34:1</b>       |                      | 99.14              | 0.398  | 5.66        | 100.00          | 0.398 |
| <b>PC aa C34:2</b>       |                      | 98.71              | 0.498  | 7.52        | 100.00          | 0.498 |
| <b>PC aa C34:3</b>       |                      | 99.14              | 0.509  | 5.32        | 98.74           | 0.509 |
| <b>PC aa C34:4</b>       |                      | 99.14              | 0.674  | 5.06        | 99.37           | 0.674 |
| <b>PC aa C36:0</b>       |                      | 100.00             | 0.552  | 11.31       | 100.00          | 0.552 |
| <b>PC aa C36:1</b>       |                      | 99.14              | 0.555  | 4.89        | 100.00          | 0.555 |
| <b>PC aa C36:2</b>       |                      | 99.14              | 0.658  | 6.33        | 100.00          | 0.658 |
| <b>PC aa C36:3</b>       |                      | 97.84              | 0.795  | 5.12        | 100.00          | 0.795 |
| <b>PC aa C36:4</b>       |                      | 98.71              | 0.910  | 5.69        | 99.37           | 0.910 |
| <b>PC aa C36:5</b>       |                      | 99.57              | 0.167  | 5.63        | 99.37           | 0.167 |
| <b>PC aa C36:6</b>       |                      | 99.57              | 0.943  | 6.09        | 99.37           | 0.943 |
| <b>PC aa C38:0</b>       |                      | 100.00             | 0.266  | 5.10        | 100.00          | 0.266 |

% above LOD = % above limit of detection, fasting = p-value of non-linear associations with fasting time (restricted cubic splines); CV = coefficient of variance

*Note:* CVs were not available for SHIP-TREND as no technical samples were measured for replication.

**Table S1 - continued:** Technical descriptive statistics for the analyzed metabolites in SHIP-TREND and SHIP-2

|                    | SHIP-TREND  |                 | SHIP-2 |             |                 |
|--------------------|-------------|-----------------|--------|-------------|-----------------|
|                    | % above LOD | p-value fasting | CV     | % above LOD | p-value fasting |
| <b>PC aa C38:1</b> | 92.67       | 0.744           | 22.56  | 98.74       | 0.744           |
| <b>PC aa C38:3</b> | 100.00      | 0.468           | 4.96   | 100.00      | 0.468           |
| <b>PC aa C38:4</b> | 99.57       | 0.470           | 5.23   | 99.37       | 0.470           |
| <b>PC aa C38:5</b> | 100.00      | 0.856           | 5.62   | 99.37       | 0.856           |
| <b>PC aa C38:6</b> | 100.00      | 0.341           | 4.69   | 100.00      | 0.341           |
| <b>PC aa C40:1</b> | 99.57       | 0.476           | 6.74   | 100.00      | 0.476           |
| <b>PC aa C40:2</b> | 99.14       | 0.699           | 9.09   | 100.00      | 0.699           |
| <b>PC aa C40:3</b> | 99.14       | 0.316           | 8.13   | 100.00      | 0.316           |
| <b>PC aa C40:4</b> | 99.14       | 0.431           | 5.19   | 100.00      | 0.431           |
| <b>PC aa C40:5</b> | 100.00      | 0.809           | 5.70   | 100.00      | 0.809           |
| <b>PC aa C40:6</b> | 100.00      | 0.527           | 5.01   | 100.00      | 0.527           |
| <b>PC aa C42:0</b> | 99.14       | 0.004           | 7.28   | 99.37       | 0.004           |
| <b>PC aa C42:1</b> | 99.14       | 0.560           | 6.20   | 100.00      | 0.560           |
| <b>PC aa C42:2</b> | 99.57       | 0.515           | 7.39   | 99.37       | 0.515           |
| <b>PC aa C42:4</b> | 99.14       | 0.257           | 7.85   | 100.00      | 0.257           |
| <b>PC aa C42:5</b> | 99.57       | 0.472           | 7.92   | 100.00      | 0.472           |
| <b>PC aa C42:6</b> | 99.14       | 0.079           | 6.91   | 100.00      | 0.079           |
| <b>PC ae C30:0</b> | 99.57       | 0.028           | 5.25   | 100.00      | 0.028           |
| <b>PC ae C30:2</b> | 100.00      | 0.431           | 6.15   | 100.00      | 0.431           |
| <b>PC ae C32:1</b> | 99.57       | 0.227           | 5.36   | 100.00      | 0.227           |
| <b>PC ae C32:2</b> | 99.14       | 0.255           | 8.97   | 100.00      | 0.255           |
| <b>PC ae C34:0</b> | 99.57       | 0.019           | 5.53   | 100.00      | 0.019           |
| <b>PC ae C34:1</b> | 99.57       | 0.117           | 4.98   | 100.00      | 0.117           |
| <b>PC ae C34:2</b> | 99.57       | 0.091           | 5.17   | 100.00      | 0.091           |
| <b>PC ae C34:3</b> | 99.57       | 0.721           | 4.60   | 100.00      | 0.721           |
| <b>PC ae C36:0</b> | 99.57       | 0.764           | 6.35   | 99.37       | 0.764           |
| <b>PC ae C36:1</b> | 99.57       | 0.049           | 5.25   | 100.00      | 0.049           |
| <b>PC ae C36:2</b> | 99.14       | 0.070           | 5.57   | 100.00      | 0.070           |
| <b>PC ae C36:3</b> | 99.57       | 0.480           | 5.26   | 100.00      | 0.480           |
| <b>PC ae C36:4</b> | 99.57       | 0.339           | 4.47   | 100.00      | 0.339           |
| <b>PC ae C36:5</b> | 100.00      | 0.686           | 5.53   | 100.00      | 0.686           |
| <b>PC ae C38:0</b> | 99.57       | 0.671           | 5.69   | 100.00      | 0.671           |
| <b>PC ae C38:2</b> | 99.14       | 0.717           | 7.33   | 100.00      | 0.717           |
| <b>PC ae C38:3</b> | 99.57       | 0.495           | 4.67   | 99.37       | 0.495           |
| <b>PC ae C38:4</b> | 99.57       | 0.334           | 5.29   | 100.00      | 0.334           |
| <b>PC ae C38:5</b> | 99.14       | 0.740           | 4.72   | 100.00      | 0.740           |

Phospholipids

% above LOD = % above limit of detection, fasting = p-value of non-linear associations with fasting time (restricted cubic splines); CV = coefficient of variance

Note: CVs were not available for SHIP-TREND as no technical samples were measured for replication.

**Table S1 - continued:** Technical descriptive statistics for the analyzed metabolites in SHIP-TREND and SHIP-2

|                      | SHIP-TREND           |                 | SHIP-2 |             |                 |       |
|----------------------|----------------------|-----------------|--------|-------------|-----------------|-------|
|                      | % above LOD          | p-value fasting | CV     | % above LOD | p-value fasting |       |
| <b>Phospholipids</b> | <b>PC ae C38:6</b>   | 100.00          | 0.522  | 4.91        | 100.00          | 0.522 |
|                      | <b>PC ae C40:1</b>   | 99.57           | 0.978  | 6.07        | 100.00          | 0.978 |
|                      | <b>PC ae C40:2</b>   | 99.57           | 0.823  | 5.41        | 100.00          | 0.823 |
|                      | <b>PC ae C40:3</b>   | 98.71           | 0.579  | 5.82        | 100.00          | 0.579 |
|                      | <b>PC ae C40:4</b>   | 99.57           | 0.386  | 4.51        | 99.37           | 0.386 |
|                      | <b>PC ae C40:5</b>   | 100.00          | 0.728  | 4.43        | 100.00          | 0.728 |
|                      | <b>PC ae C40:6</b>   | 100.00          | 0.386  | 5.41        | 100.00          | 0.386 |
|                      | <b>PC ae C42:0</b>   | 98.71           | 0.599  | 7.33        | 100.00          | 0.599 |
|                      | <b>PC ae 42:1</b>    | 100.00          | 0.439  | 6.60        | 100.00          | 0.439 |
|                      | <b>PC ae C42:2</b>   | 99.57           | 0.903  | 7.65        | 100.00          | 0.903 |
|                      | <b>PC ae C42:3</b>   | 100.00          | 0.927  | 6.14        | 100.00          | 0.927 |
|                      | <b>PC ae C42:4</b>   | 99.57           | 0.034  | 4.68        | 98.74           | 0.034 |
|                      | <b>PC ae C42:5</b>   | 99.57           | 0.140  | 3.93        | 98.11           | 0.140 |
|                      | <b>PC ae C44:3</b>   | 99.14           | 0.152  | 12.65       | 100.00          | 0.152 |
|                      | <b>PC ae C44:4</b>   | 99.14           | 0.636  | 7.86        | 98.11           | 0.636 |
|                      | <b>PC ae C44:5</b>   | 100.00          | 0.108  | 6.30        | 98.11           | 0.108 |
|                      | <b>PC ae C44:6</b>   | 99.57           | 0.247  | 4.96        | 98.74           | 0.247 |
| <b>Sphingolipids</b> | <b>SM (OH) C14:1</b> | 100.00          | 0.365  | 4.74        | 99.37           | 0.365 |
|                      | <b>SM (OH) C16:1</b> | 100.00          | 0.371  | 5.51        | 100.00          | 0.371 |
|                      | <b>SM (OH) C22:1</b> | 100.00          | 0.249  | 5.38        | 100.00          | 0.249 |
|                      | <b>SM (OH) C22:2</b> | 100.00          | 0.273  | 6.22        | 100.00          | 0.273 |
|                      | <b>SM (OH) C24:1</b> | 98.71           | 0.282  | 6.14        | 100.00          | 0.282 |
|                      | <b>SM C16:0</b>      | 100.00          | 0.560  | 5.41        | 100.00          | 0.560 |
|                      | <b>SM C16:1</b>      | 100.00          | 0.073  | 5.31        | 100.00          | 0.073 |
|                      | <b>SM C18:0</b>      | 99.57           | 0.029  | 5.27        | 100.00          | 0.029 |
|                      | <b>SM C18:1</b>      | 99.14           | 0.259  | 4.94        | 100.00          | 0.259 |
|                      | <b>SM C20:2</b>      | 99.14           | 0.158  | 7.29        | 98.74           | 0.158 |
|                      | <b>SM C22:3</b>      | 91.81           | 0.229  | 9.62        | 100.00          | 0.229 |
|                      | <b>SM C24:0</b>      | 100.00          | 0.045  | 5.35        | 100.00          | 0.045 |
|                      | <b>SM C24:1</b>      | 100.00          | 0.016  | 5.17        | 100.00          | 0.016 |
|                      | <b>SM C26:0</b>      | 98.71           | 0.280  | 8.15        | 100.00          | 0.280 |
|                      | <b>SM C26:1</b>      | 99.57           | 0.403  | 12.84       | 100.00          | 0.403 |
| <b>Hexose</b>        | 98.28                | 0.590           | 5.16   | 98.74       | 0.590           |       |

% above LOD = % above limit of detection, fasting = p-value of non-linear associations with fasting time (restricted cubic splines); CV = coefficient of variance

*Note:* CVs were not available for SHIP-TREND as no technical samples were measured for replication.



**Table S4:** Metabolites associated with serum cortisol concentrations.

|                    | SHIP-TREND              |                                                     |                         | SHIP-2                  |                                                     |                        | Meta-analysis           |                                                     |                         | Heterogeneity |                        |
|--------------------|-------------------------|-----------------------------------------------------|-------------------------|-------------------------|-----------------------------------------------------|------------------------|-------------------------|-----------------------------------------------------|-------------------------|---------------|------------------------|
|                    | b                       | 95%-CI                                              | p-value                 | b                       | 95%-CI                                              | p-value                | b                       | 95%-CI                                              | p-value                 | b             | p-value                |
| <b>Carnitine</b>   | -4.761x10 <sup>-4</sup> | (-6.692x10 <sup>-4</sup> ;-2.831x10 <sup>-4</sup> ) | 2.236x10 <sup>-6</sup>  | -2.341x10 <sup>-4</sup> | (-5.032x10 <sup>-4</sup> ;3.507x10 <sup>-5</sup> )  | 0.088                  | -3.936x10 <sup>-4</sup> | (-5.494x10 <sup>-4</sup> ;-2.378x10 <sup>-4</sup> ) | 7.413x10 <sup>-7</sup>  | 51.971        | 0.149                  |
| <b>Citrulline</b>  | -5.975x10 <sup>-4</sup> | (-8.798x10 <sup>-4</sup> ;-3.153x10 <sup>-4</sup> ) | 4.378x10 <sup>-5</sup>  | -2.334x10 <sup>-4</sup> | (-6.041x10 <sup>-4</sup> ;1.374x10 <sup>-4</sup> )  | 0.216                  | -4.635x10 <sup>-4</sup> | (-6.866x10 <sup>-4</sup> ;-2.404x10 <sup>-4</sup> ) | 4.671x10 <sup>-5</sup>  | 57.999        | 0.123                  |
| <b>Glutamine</b>   | -5.259x10 <sup>-4</sup> | (-7.259x10 <sup>-4</sup> ;-3.260x10 <sup>-4</sup> ) | 4.990x10 <sup>-7</sup>  | -3.786x10 <sup>-4</sup> | (-6.261x10 <sup>-4</sup> ;-1.311x10 <sup>-4</sup> ) | 0.003                  | -4.675x10 <sup>-4</sup> | (-6.220x10 <sup>-4</sup> ;-3.130x10 <sup>-4</sup> ) | 3.004x10 <sup>-9</sup>  | 0.000         | 0.360                  |
| <b>Glycine</b>     | -0.001                  | (-0.001;-8.022x10 <sup>-4</sup> )                   | 1.783x10 <sup>-10</sup> | -0.001                  | (-0.002;-8.178x10 <sup>-4</sup> )                   | 8.876x10 <sup>-7</sup> | -0.001                  | (-0.001;-9.164x10 <sup>-4</sup> )                   | 3.826x10 <sup>-17</sup> | 0.000         | 0.534                  |
| <b>Ornithine</b>   | -9.485x10 <sup>-4</sup> | (-0.001;-6.740x10 <sup>-4</sup> )                   | 9.655x10 <sup>-11</sup> | -6.759x10 <sup>-4</sup> | (-0.001;-2.411x10 <sup>-4</sup> )                   | 0.003                  | -8.705x10 <sup>-4</sup> | (-0.001;-6.400x10 <sup>-4</sup> )                   | 1.364x10 <sup>-13</sup> | 8.765         | 0.295                  |
| <b>Tyrosine</b>    | -6.198x10 <sup>-4</sup> | (-8.931x10 <sup>-4</sup> ;-3.465x10 <sup>-4</sup> ) | 1.266x10 <sup>-5</sup>  | -1.277x10 <sup>-4</sup> | (-5.430x10 <sup>-4</sup> ;2.876x10 <sup>-4</sup> )  | 0.544                  | -4.705x10 <sup>-4</sup> | (-6.973x10 <sup>-4</sup> ;-2.437x10 <sup>-4</sup> ) | 4.792x10 <sup>-5</sup>  | 73.829        | 0.051                  |
| <b>LPC a C14:0</b> | 4.437x10 <sup>-4</sup>  | (2.356x10 <sup>-4</sup> ;6.517x10 <sup>-4</sup> )   | 3.834x10 <sup>-5</sup>  | -2.685x10 <sup>-5</sup> | (-2.071x10 <sup>-4</sup> ;1.534x10 <sup>-4</sup> )  | 0.769                  | 1.743x10 <sup>-4</sup>  | (3.906x10 <sup>-5</sup> ;3.096x10 <sup>-4</sup> )   | 0.012                   | 91.210        | 7.439x10 <sup>-4</sup> |
| <b>LPC a C17:0</b> | -4.465x10 <sup>-4</sup> | (-7.178x10 <sup>-4</sup> ;-1.752x10 <sup>-4</sup> ) | 0.001                   | -0.001                  | (-0.002;-9.647x10 <sup>-4</sup> )                   | 1.119x10 <sup>-8</sup> | -6.961x10 <sup>-4</sup> | (-9.292x10 <sup>-4</sup> ;-4.630x10 <sup>-4</sup> ) | 4.818x10 <sup>-9</sup>  | 92.298        | 3.143x10 <sup>-4</sup> |
| <b>LPC a C18:0</b> | -6.643x10 <sup>-4</sup> | (-9.060x10 <sup>-4</sup> ;-4.227x10 <sup>-4</sup> ) | 1.598x10 <sup>-7</sup>  | -0.001                  | (-0.002;-9.201x10 <sup>-4</sup> )                   | 3.366x10 <sup>-9</sup> | -8.332x10 <sup>-4</sup> | (-0.001;-6.250x10 <sup>-4</sup> )                   | 4.265x10 <sup>-15</sup> | 86.824        | 0.006                  |
| <b>LPC a C18:1</b> | -5.393x10 <sup>-4</sup> | (-7.689x10 <sup>-4</sup> ;-3.097x10 <sup>-4</sup> ) | 6.320x10 <sup>-6</sup>  | -0.001                  | (-0.002;-8.612x10 <sup>-4</sup> )                   | 2.010x10 <sup>-8</sup> | -7.071x10 <sup>-4</sup> | (-9.083x10 <sup>-4</sup> ;-5.058x10 <sup>-4</sup> ) | 5.764x10 <sup>-12</sup> | 89.230        | 0.002                  |
| <b>LPC a C18:2</b> | -9.347x10 <sup>-4</sup> | (-0.001;-6.543x10 <sup>-4</sup> )                   | 3.665x10 <sup>-10</sup> | -0.002                  | (-0.002;-0.001)                                     | 1.752x10 <sup>-9</sup> | -0.001                  | (-0.001;-8.504x10 <sup>-4</sup> )                   | 3.646x10 <sup>-19</sup> | 77.161        | 0.036                  |
| <b>LPC a C20:4</b> | -1.547x10 <sup>-4</sup> | (-4.142x10 <sup>-4</sup> ;1.048x10 <sup>-4</sup> )  | 0.241                   | -8.989x10 <sup>-4</sup> | (-0.001;-5.227x10 <sup>-4</sup> )                   | 5.433x10 <sup>-6</sup> | -3.955x10 <sup>-4</sup> | (-6.077x10 <sup>-4</sup> ;-1.832x10 <sup>-4</sup> ) | 2.601x10 <sup>-4</sup>  | 90.327        | 0.001                  |
| <b>LPC a C26:0</b> | 5.609x10 <sup>-4</sup>  | (2.965x10 <sup>-4</sup> ;8.252x10 <sup>-4</sup> )   | 4.196x10 <sup>-5</sup>  | 5.904x10 <sup>-4</sup>  | (2.447x10 <sup>-4</sup> ;9.361x10 <sup>-4</sup> )   | 9.441x10 <sup>-4</sup> | 5.718x10 <sup>-4</sup>  | (3.632x10 <sup>-4</sup> ;7.804x10 <sup>-4</sup> )   | 7.763x10 <sup>-8</sup>  | 0.000         | 0.893                  |
| <b>PC aa C30:0</b> | 0.001                   | (7.810x10 <sup>-4</sup> ;0.001)                     | 2.339x10 <sup>-10</sup> | 4.910x10 <sup>-4</sup>  | (-8.930x10 <sup>-5</sup> ;0.001)                    | 0.097                  | 9.588x10 <sup>-4</sup>  | (6.743x10 <sup>-4</sup> ;0.001)                     | 3.937x10 <sup>-11</sup> | 70.226        | 0.067                  |
| <b>PC aa C32:0</b> | 5.616x10 <sup>-4</sup>  | (3.266x10 <sup>-4</sup> ;7.966x10 <sup>-4</sup> )   | 4.416x10 <sup>-6</sup>  | 3.270x10 <sup>-4</sup>  | (-4.301x10 <sup>-6</sup> ;6.583x10 <sup>-4</sup> )  | 0.053                  | 4.828x10 <sup>-4</sup>  | (2.924x10 <sup>-4</sup> ;6.732x10 <sup>-4</sup> )   | 6.732x10 <sup>-7</sup>  | 23.118        | 0.254                  |
| <b>PC aa C32:1</b> | 0.001                   | (0.001;0.002)                                       | 1.403x10 <sup>-12</sup> | 0.002                   | (9.947x10 <sup>-4</sup> ;0.003)                     | 1.368x10 <sup>-5</sup> | 0.002                   | (0.001;0.002)                                       | 2.264x10 <sup>-18</sup> | 0.000         | 0.501                  |
| <b>PC aa C32:2</b> | 7.518x10 <sup>-4</sup>  | (4.197x10 <sup>-4</sup> ;0.001)                     | 1.308x10 <sup>-5</sup>  | 8.632x10 <sup>-4</sup>  | (3.174x10 <sup>-4</sup> ;0.001)                     | 0.002                  | 7.821x10 <sup>-4</sup>  | (5.001x10 <sup>-4</sup> ;0.001)                     | 5.451x10 <sup>-8</sup>  | 0.000         | 0.731                  |
| <b>PC aa C34:1</b> | 8.289x10 <sup>-4</sup>  | (5.993x10 <sup>-4</sup> ;0.001)                     | 1.606x10 <sup>-11</sup> | 6.332x10 <sup>-4</sup>  | (3.423x10 <sup>-4</sup> ;9.240x10 <sup>-4</sup> )   | 3.078x10 <sup>-5</sup> | 7.535x10 <sup>-4</sup>  | (5.745x10 <sup>-4</sup> ;9.325x10 <sup>-4</sup> )   | 1.594x10 <sup>-16</sup> | 7.978         | 0.297                  |
| <b>PC aa C34:2</b> | 6.743x10 <sup>-4</sup>  | (4.772x10 <sup>-4</sup> ;8.715x10 <sup>-4</sup> )   | 1.411x10 <sup>-10</sup> | 3.776x10 <sup>-4</sup>  | (1.644x10 <sup>-4</sup> ;5.908x10 <sup>-4</sup> )   | 6.157x10 <sup>-4</sup> | 5.371x10 <sup>-4</sup>  | (3.934x10 <sup>-4</sup> ;6.809x10 <sup>-4</sup> )   | 2.421x10 <sup>-13</sup> | 75.420        | 0.044                  |
| <b>PC aa C34:3</b> | 9.363x10 <sup>-4</sup>  | (6.641x10 <sup>-4</sup> ;0.001)                     | 1.113x10 <sup>-10</sup> | 7.509x10 <sup>-4</sup>  | (2.596x10 <sup>-4</sup> ;0.001)                     | 0.003                  | 8.925x10 <sup>-4</sup>  | (6.560x10 <sup>-4</sup> ;0.001)                     | 1.415x10 <sup>-13</sup> | 0.000         | 0.514                  |
| <b>PC aa C34:4</b> | 0.002                   | (0.001;0.002)                                       | 5.193x10 <sup>-15</sup> | 0.001                   | (5.761x10 <sup>-4</sup> ;0.002)                     | 1.518x10 <sup>-4</sup> | 0.001                   | (0.001;0.002)                                       | 3.126x10 <sup>-20</sup> | 8.793         | 0.295                  |
| <b>PC aa C36:3</b> | 9.143x10 <sup>-4</sup>  | (6.915x10 <sup>-4</sup> ;0.001)                     | 4.435x10 <sup>-14</sup> | 8.741x10 <sup>-4</sup>  | (5.589x10 <sup>-4</sup> ;0.001)                     | 1.819x10 <sup>-7</sup> | 9.008x10 <sup>-4</sup>  | (7.201x10 <sup>-4</sup> ;0.001)                     | 1.536x10 <sup>-22</sup> | 0.000         | 0.837                  |
| <b>PC aa C36:4</b> | 0.001                   | (7.799x10 <sup>-4</sup> ;0.001)                     | 3.582x10 <sup>-13</sup> | 8.961x10 <sup>-4</sup>  | (5.972x10 <sup>-4</sup> ;0.001)                     | 2.169x10 <sup>-8</sup> | 9.795x10 <sup>-4</sup>  | (7.821x10 <sup>-4</sup> ;0.001)                     | 2.319x10 <sup>-22</sup> | 0.000         | 0.460                  |

|                    |                        |                                                   |                        |                        |                                                   |                        |                        |                                                   |                         |       |       |
|--------------------|------------------------|---------------------------------------------------|------------------------|------------------------|---------------------------------------------------|------------------------|------------------------|---------------------------------------------------|-------------------------|-------|-------|
| <b>PC aa C36:6</b> | 0.001                  | (6.973x10 <sup>-4</sup> ;0.001)                   | 1.056x10 <sup>-8</sup> | 8.198x10 <sup>-4</sup> | (1.591x10 <sup>-4</sup> ;0.001)                   | 0.015                  | 9.946x10 <sup>-4</sup> | (6.904x10 <sup>-4</sup> ;0.001)                   | 1.467x10 <sup>-10</sup> | 0.000 | 0.555 |
| <b>PC aa C38:6</b> | 7.162x10 <sup>-4</sup> | (4.300x10 <sup>-4</sup> ;0.001)                   | 1.613x10 <sup>-6</sup> | 7.830x10 <sup>-4</sup> | (3.090x10 <sup>-4</sup> ;0.001)                   | 0.001                  | 7.341x10 <sup>-4</sup> | (4.906x10 <sup>-4</sup> ;9.776x10 <sup>-4</sup> ) | 3.435x10 <sup>-9</sup>  | 0.000 | 0.812 |
| <b>PC ae C42:0</b> | 5.246x10 <sup>-4</sup> | (3.565x10 <sup>-4</sup> ;6.928x10 <sup>-4</sup> ) | 3.710x10 <sup>-9</sup> | 4.666x10 <sup>-4</sup> | (2.649x10 <sup>-4</sup> ;6.682x10 <sup>-4</sup> ) | 1.021x10 <sup>-5</sup> | 5.007x10 <sup>-4</sup> | (3.725x10 <sup>-4</sup> ;6.290x10 <sup>-4</sup> ) | 1.998x10 <sup>-14</sup> | 0.000 | 0.662 |
| <b>SM C20:2</b>    | 7.251x10 <sup>-4</sup> | (4.178x10 <sup>-4</sup> ;0.001)                   | 5.761x10 <sup>-6</sup> | 6.859x10 <sup>-4</sup> | (2.595x10 <sup>-4</sup> ;0.001)                   | 0.002                  | 7.117x10 <sup>-4</sup> | (4.640x10 <sup>-4</sup> ;9.594x10 <sup>-4</sup> ) | 1.789x10 <sup>-8</sup>  | 0.000 | 0.883 |

Analyses adjusted for age, time of blood sampling, fasting time, waist circumference, white blood cell count, red blood cell count, thrombocytes count, and cystatin C concentrations. Metabolites are presented if the effect of OC use was Bonferroni-corrected significant (171 tests:  $p < 2.924 \times 10^{-4}$ ) in SHIP-TREND. Italics = meta-analytic effect after Bonferroni-correction (27 test:  $p < 0.002$ ) not significant

**Table S5.** Metabolites associated with OC intake in the dependence of menstrual bleeding at the time of assessment in SHIP-TREND.

|                    | no menstruation      |                 |                         | menstruation             |                |         |                      |                 |                        |
|--------------------|----------------------|-----------------|-------------------------|--------------------------|----------------|---------|----------------------|-----------------|------------------------|
|                    | OC users<br>(N = 63) |                 |                         | OC non-users<br>(N = 32) |                |         | OC users<br>(N = 10) |                 |                        |
|                    | b                    | 95%-CI          | p-value                 | b                        | 95%-CI         | p-value | b                    | 95%-CI          | p-value                |
| <b>Carnitine</b>   | -0.184               | (-0.264;-0.104) | 9.415x10 <sup>-6</sup>  | 0.063                    | (-0.038;0.165) | 0.221   | 0.025                | (-0.172;0.222)  | 0.802                  |
| <b>Citrulline</b>  | -0.337               | (-0.461;-0.213) | 2.129x10 <sup>-7</sup>  | 0.063                    | (-0.070;0.195) | 0.351   | -0.035               | (-0.211;0.141)  | 0.697                  |
| <b>Glutamine</b>   | -0.245               | (-0.332;-0.158) | 8.266x10 <sup>-8</sup>  | 0.030                    | (-0.063;0.124) | 0.526   | -0.076               | (-0.200;0.047)  | 0.226                  |
| <b>Glycine</b>     | -0.443               | (-0.599;-0.287) | 6.479x10 <sup>-8</sup>  | 0.022                    | (-0.142;0.187) | 0.789   | -0.286               | (-0.503;-0.069) | 0.010                  |
| <b>Ornithine</b>   | -0.481               | (-0.599;-0.363) | 7.152x10 <sup>-14</sup> | 0.009                    | (-0.121;0.138) | 0.897   | 0.135                | (-0.118;0.387)  | 0.296                  |
| <b>Tyrosine</b>    | -0.279               | (-0.380;-0.177) | 1.747x10 <sup>-7</sup>  | 0.151                    | (0.030;0.271)  | 0.015   | -0.028               | (-0.298;0.243)  | 0.841                  |
| <b>LPC a C14:0</b> | 0.202                | (0.115;0.288)   | 7.006x10 <sup>-6</sup>  | 0.107                    | (-0.009;0.223) | 0.069   | 0.241                | (0.053;0.430)   | 0.012                  |
| <b>LPC a C17:0</b> | -0.277               | (-0.377;-0.176) | 1.510x10 <sup>-7</sup>  | 0.001                    | (-0.135;0.137) | 0.987   | 0.064                | (-0.173;0.301)  | 0.595                  |
| <b>LPC a C18:0</b> | -0.371               | (-0.468;-0.275) | 1.043x10 <sup>-12</sup> | 0.119                    | (0.004;0.234)  | 0.042   | -0.167               | (-0.354;0.019)  | 0.079                  |
| <b>LPC a C18:1</b> | -0.325               | (-0.423;-0.228) | 3.715x10 <sup>-10</sup> | 0.062                    | (-0.052;0.177) | 0.283   | -0.018               | (-0.188;0.151)  | 0.831                  |
| <b>LPC a C18:2</b> | -0.476               | (-0.594;-0.359) | 8.135x10 <sup>-14</sup> | 0.032                    | (-0.098;0.162) | 0.629   | -0.098               | (-0.324;0.128)  | 0.393                  |
| <b>LPC a C20:4</b> | -0.202               | (-0.296;-0.107) | 3.738x10 <sup>-5</sup>  | 0.016                    | (-0.108;0.140) | 0.797   | -0.036               | (-0.248;0.177)  | 0.741                  |
| <b>LPC a C26:0</b> | 0.182                | (0.066;0.298)   | 0.002                   | 0.017                    | (-0.103;0.137) | 0.779   | 0.359                | (0.186;0.531)   | 5.807x10 <sup>-5</sup> |
| <b>PC aa C30:0</b> | 0.512                | (0.376;0.649)   | 3.292x10 <sup>-12</sup> | 0.207                    | (0.030;0.383)  | 0.022   | 0.334                | (0.070;0.598)   | 0.013                  |
| <b>PC aa C32:0</b> | 0.204                | (0.109;0.299)   | 3.558x10 <sup>-5</sup>  | 0.091                    | (-0.014;0.195) | 0.089   | 0.134                | (0.006;0.261)   | 0.040                  |
| <b>PC aa C32:1</b> | 0.725                | (0.541;0.908)   | 2.816x10 <sup>-13</sup> | 0.255                    | (0.039;0.472)  | 0.021   | 0.364                | (0.020;0.707)   | 0.038                  |
| <b>PC aa C32:2</b> | 0.410                | (0.263;0.557)   | 1.060x10 <sup>-7</sup>  | 0.084                    | (-0.106;0.275) | 0.385   | 0.255                | (-0.136;0.645)  | 0.200                  |
| <b>PC aa C34:1</b> | 0.317                | (0.219;0.415)   | 1.095x10 <sup>-9</sup>  | 0.123                    | (0.004;0.242)  | 0.043   | 0.255                | (0.022;0.488)   | 0.032                  |
| <b>PC aa C34:2</b> | 0.271                | (0.186;0.357)   | 1.928x10 <sup>-9</sup>  | 0.065                    | (-0.030;0.160) | 0.180   | 0.152                | (-0.048;0.351)  | 0.135                  |
| <b>PC aa C34:3</b> | 0.455                | (0.335;0.574)   | 1.541x10 <sup>-12</sup> | 0.227                    | (0.075;0.379)  | 0.004   | 0.188                | (-0.053;0.430)  | 0.126                  |
| <b>PC aa C34:4</b> | 0.633                | (0.485;0.781)   | 5.059x10 <sup>-15</sup> | 0.204                    | (0.028;0.379)  | 0.023   | 0.439                | (0.073;0.804)   | 0.019                  |
| <b>PC aa C36:3</b> | 0.343                | (0.246;0.440)   | 4.116x10 <sup>-11</sup> | 0.052                    | (-0.065;0.170) | 0.379   | 0.148                | (-0.065;0.362)  | 0.171                  |
| <b>PC aa C36:4</b> | 0.358                | (0.252;0.464)   | 2.183x10 <sup>-10</sup> | 0.039                    | (-0.089;0.168) | 0.548   | 0.156                | (-0.020;0.331)  | 0.081                  |
| <b>PC aa C36:6</b> | 0.470                | (0.331;0.609)   | 2.276x10 <sup>-10</sup> | 0.213                    | (0.040;0.386)  | 0.016   | 0.419                | (0.178;0.661)   | 7.283x10 <sup>-4</sup> |
| <b>PC aa C38:6</b> | 0.278                | (0.161;0.395)   | 5.083x10 <sup>-6</sup>  | 0.075                    | (-0.070;0.221) | 0.308   | 0.297                | (0.075;0.518)   | 0.009                  |
| <b>PC ae C42:0</b> | 0.160                | (0.087;0.233)   | 2.396x10 <sup>-5</sup>  | -0.004                   | (-0.110;0.103) | 0.948   | 0.111                | (-0.004;0.227)  | 0.059                  |
| <b>SM C20:2</b>    | 0.292                | (0.151;0.433)   | 6.388x10 <sup>-5</sup>  | 0.048                    | (-0.108;0.203) | 0.547   | 0.322                | (0.060;0.583)   | 0.016                  |

Analyses adjusted for age, time of blood sampling, fasting time (RCS), waist circumference, white blood cell count, red blood cell count, thrombocytes count, and cystatin C concentrations. OC non-users without menstrual bleeding at the time of assessment used as the reference group (N = 127).

Metabolites presented if the effect of OC use was Bonferroni-corrected significant (171 tests:  $p < 2.924 \times 10^{-4}$ ) in SHIP-TREND.

**Table S6.** Metabolites associated with OC intake in the dependence of menstrual bleeding at the time of assessment in SHIP-2.

|  | no menstruation |  |  | menstruation |  |  |
|--|-----------------|--|--|--------------|--|--|
|  | OC users        |  |  | OC non-users |  |  |

|                    | (N = 36) |                 |                         | (N = 24) |                |         | (N = 7) |                                 |                        |
|--------------------|----------|-----------------|-------------------------|----------|----------------|---------|---------|---------------------------------|------------------------|
|                    | b        | 95%-CI          | p-value                 | b        | 95%-CI         | p-value | b       | 95%-CI                          | p-value                |
| <b>Carnitine</b>   | -0.114   | (-0.211;-0.016) | 0.023                   | 0.007    | (-0.139;0.154) | 0.921   | -0.061  | (-0.173;0.052)                  | 0.290                  |
| <b>Citrulline</b>  | -0.163   | (-0.295;-0.031) | 0.016                   | 0.100    | (-0.061;0.261) | 0.221   | -0.002  | (-0.324;0.320)                  | 0.990                  |
| <b>Glutamine</b>   | -0.225   | (-0.309;-0.142) | 3.775x10 <sup>-7</sup>  | 0.039    | (-0.065;0.143) | 0.459   | -0.144  | (-0.228;-0.060)                 | 9.311x10 <sup>-4</sup> |
| <b>Glycine</b>     | -0.545   | (-0.694;-0.396) | 2.586x10 <sup>-11</sup> | 0.085    | (-0.110;0.279) | 0.392   | -0.564  | (-0.802;-0.327)                 | 6.104x10 <sup>-6</sup> |
| <b>Ornithine</b>   | -0.310   | (-0.434;-0.185) | 2.291x10 <sup>-6</sup>  | 0.144    | (-0.043;0.332) | 0.131   | -0.265  | (-0.643;0.114)                  | 0.169                  |
| <b>Tyrosine</b>    | -0.304   | (-0.447;-0.161) | 4.595x10 <sup>-5</sup>  | 0.073    | (-0.141;0.287) | 0.502   | 0.128   | (-0.183;0.440)                  | 0.418                  |
| <b>LPC a C14:0</b> | -0.019   | (-0.076;0.038)  | 0.505                   | 0.051    | (-0.030;0.132) | 0.213   | 0.034   | (-0.081;0.150)                  | 0.558                  |
| <b>LPC a C17:0</b> | -0.495   | (-0.669;-0.320) | 1.025x10 <sup>-7</sup>  | 0.208    | (0.013;0.403)  | 0.037   | -0.531  | (-0.806;-0.255)                 | 2.062x10 <sup>-4</sup> |
| <b>LPC a C18:0</b> | -0.559   | (-0.716;-0.403) | 7.069x10 <sup>-11</sup> | 0.108    | (-0.060;0.276) | 0.205   | -0.661  | (-0.923;-0.400)                 | 1.691x10 <sup>-6</sup> |
| <b>LPC a C18:1</b> | -0.507   | (-0.658;-0.356) | 6.185x10 <sup>-10</sup> | 0.213    | (0.018;0.407)  | 0.032   | -0.578  | (-0.860;-0.297)                 | 7.961x10 <sup>-5</sup> |
| <b>LPC a C18:2</b> | -0.579   | (-0.751;-0.406) | 5.957x10 <sup>-10</sup> | 0.131    | (-0.062;0.324) | 0.181   | -0.843  | (-1.179;-0.507)                 | 1.976x10 <sup>-6</sup> |
| <b>LPC a C20:4</b> | -0.336   | (-0.461;-0.211) | 4.120x10 <sup>-7</sup>  | 0.100    | (-0.056;0.256) | 0.208   | -0.458  | (-0.722;-0.194)                 | 7.914x10 <sup>-4</sup> |
| <b>LPC a C26:0</b> | 0.162    | (0.030;0.295)   | 0.017                   | 0.013    | (-0.146;0.172) | 0.869   | 0.147   | (-0.074;0.368)                  | 0.190                  |
| <b>PC aa C30:0</b> | 0.100    | (-0.068;0.268)  | 0.242                   | 0.012    | (-0.228;0.251) | 0.922   | 0.201   | (-0.118;0.519)                  | 0.215                  |
| <b>PC aa C32:0</b> | 0.109    | (0.013;0.206)   | 0.026                   | -0.039   | (-0.179;0.102) | 0.588   | 0.076   | (-0.167;0.319)                  | 0.536                  |
| <b>PC aa C32:1</b> | 0.352    | (0.092;0.612)   | 0.008                   | 0.112    | (-0.149;0.373) | 0.397   | 0.661   | (0.021;1.300)                   | 0.043                  |
| <b>PC aa C32:2</b> | 0.251    | (0.087;0.414)   | 0.003                   | 0.033    | (-0.168;0.234) | 0.748   | 0.321   | (-0.030;0.671)                  | 0.072                  |
| <b>PC aa C34:1</b> | 0.197    | (0.097;0.297)   | 1.422x10 <sup>-4</sup>  | 0.031    | (-0.095;0.157) | 0.630   | 0.216   | (-0.098;0.529)                  | 0.176                  |
| <b>PC aa C34:2</b> | 0.144    | (0.070;0.218)   | 1.701x10 <sup>-4</sup>  | -0.046   | (-0.146;0.053) | 0.355   | 0.041   | (-0.168;0.250)                  | 0.699                  |
| <b>PC aa C34:3</b> | 0.178    | (0.024;0.333)   | 0.024                   | 0.015    | (-0.178;0.209) | 0.878   | 0.238   | (-0.096;0.573)                  | 0.161                  |
| <b>PC aa C34:4</b> | 0.322    | (0.116;0.529)   | 0.002                   | 0.033    | (-0.228;0.295) | 0.800   | 0.436   | (0.041;0.831)                   | 0.031                  |
| <b>PC aa C36:3</b> | 0.263    | (0.153;0.373)   | 5.599x10 <sup>-6</sup>  | -0.014   | (-0.152;0.124) | 0.839   | 0.280   | (0.037;0.524)                   | 0.024                  |
| <b>PC aa C36:4</b> | 0.295    | (0.188;0.401)   | 1.887x10 <sup>-7</sup>  | -0.069   | (-0.205;0.067) | 0.315   | 0.262   | (0.009;0.515)                   | 0.042                  |
| <b>PC aa C36:6</b> | 0.154    | (-0.071;0.379)  | 0.179                   | 0.015    | (-0.231;0.262) | 0.901   | 0.477   | (0.133;0.820)                   | 0.007                  |
| <b>PC aa C38:6</b> | 0.170    | (0.012;0.327)   | 0.035                   | -0.095   | (-0.251;0.060) | 0.229   | 0.409   | (0.203;0.615)                   | 1.345x10 <sup>-4</sup> |
| <b>PC ae C42:0</b> | 0.115    | (0.030;0.200)   | 0.009                   | -0.058   | (-0.159;0.043) | 0.258   | 0.124   | (1.475x10 <sup>-4</sup> ;0.247) | 0.050                  |
| <b>SM C20:2</b>    | 0.143    | (-0.002;0.289)  | 0.054                   | -0.010   | (-0.178;0.158) | 0.906   | 0.319   | (0.066;0.573)                   | 0.014                  |

Analyses adjusted for age, time of blood sampling, fasting time (RCS), waist circumference, white blood cell count, red blood cell count, thrombocytes count, and cystatin C concentrations. OC non-users without menstrual bleeding at the time of assessment used as the reference group (N = 92).

Metabolites presented if the effect of OC use was Bonferroni-corrected significant (171 tests:  $p < 2.924 \times 10^{-4}$ ) in SHIP-TREND.

**Table S7.** Meta-analytic results for metabolites associated with OC intake in the dependence of menstrual bleeding at the time of assessment.

|                    | Meta-analyses        |                                 |                         |                          |                |         |                      |                 |                        | Heterogeneity |                        |              |         |          |                        |
|--------------------|----------------------|---------------------------------|-------------------------|--------------------------|----------------|---------|----------------------|-----------------|------------------------|---------------|------------------------|--------------|---------|----------|------------------------|
|                    | no menstruation      |                                 |                         | menstruation             |                |         | no menstruation      |                 |                        | menstruation  |                        |              |         |          |                        |
|                    | OC users<br>(N = 99) |                                 |                         | OC non-users<br>(N = 56) |                |         | OC users<br>(N = 17) |                 |                        | OC users      |                        | OC non-users |         | OC users |                        |
|                    | b                    | 95%-CI                          | p-value                 | b                        | 95%-CI         | p-value | b                    | 95%-CI          | p-value                | b             | p-value                | b            | p-value | b        | p-value                |
| <b>Carnitine</b>   | -0.156               | (-0.217;-0.094)                 | 6.786x10 <sup>-7</sup>  | 0.045                    | (-0.038;0.128) | 0.287   | -0.040               | (-0.137;0.057)  | 0.425                  | 17.833        | 0.270                  | 0.000        | 0.535   | 0.000    | 0.457                  |
| <b>Citrulline</b>  | -0.256               | (-0.345;-0.166)                 | 2.426x10 <sup>-8</sup>  | 0.078                    | (-0.024;0.179) | 0.133   | -0.027               | (-0.181;0.126)  | 0.728                  | 72.274        | 0.058                  | 0.000        | 0.724   | 0.000    | 0.860                  |
| <b>Glutamine</b>   | -0.235               | (-0.295;-0.175)                 | 1.453x10 <sup>-14</sup> | 0.034                    | (-0.035;0.103) | 0.332   | -0.123               | (-0.192;-0.053) | 5.036x10 <sup>-4</sup> | 0.000         | 0.743                  | 0.000        | 0.899   | 0.000    | 0.370                  |
| <b>Glycine</b>     | -0.497               | (-0.604;-0.390)                 | 8.906x10 <sup>-20</sup> | 0.048                    | (-0.076;0.173) | 0.447   | -0.413               | (-0.572;-0.254) | 3.585x10 <sup>-7</sup> | 0.000         | 0.352                  | 0.000        | 0.629   | 65.781   | 0.087                  |
| <b>Ornithine</b>   | -0.399               | (-0.484;-0.314)                 | 3.179x10 <sup>-20</sup> | 0.052                    | (-0.053;0.158) | 0.332   | 0.011                | (-0.198;0.220)  | 0.919                  | 74.275        | 0.049                  | 27.896       | 0.239   | 66.669   | 0.083                  |
| <b>Tyrosine</b>    | -0.287               | (-0.369;-0.205)                 | 7.777x10 <sup>-12</sup> | 0.132                    | (0.028;0.236)  | 0.013   | 0.040                | (-0.163;0.242)  | 0.702                  | 0.000         | 0.773                  | 0.000        | 0.531   | 0.000    | 0.457                  |
| <b>LPC a C14:0</b> | 0.047                | (3.415x10 <sup>-4</sup> ;0.095) | 0.048                   | 0.070                    | (0.004;0.136)  | 0.038   | 0.091                | (-0.007;0.188)  | 0.069                  | 94.376        | 2.478x10 <sup>-5</sup> | 0.000        | 0.436   | 70.795   | 0.064                  |
| <b>LPC a C17:0</b> | -0.331               | (-0.418;-0.245)                 | 6.046x10 <sup>-14</sup> | 0.069                    | (-0.042;0.180) | 0.223   | -0.190               | (-0.369;-0.012) | 0.037                  | 78.164        | 0.032                  | 66.019       | 0.086   | 90.413   | 0.001                  |
| <b>LPC a C18:0</b> | -0.423               | (-0.505;-0.342)                 | 2.876x10 <sup>-24</sup> | 0.116                    | (0.021;0.210)  | 0.016   | -0.334               | (-0.485;-0.184) | 1.387x10 <sup>-5</sup> | 75.428        | 0.044                  | 0.000        | 0.915   | 89.153   | 0.002                  |
| <b>LPC a C18:1</b> | -0.379               | (-0.461;-0.298)                 | 7.419x10 <sup>-20</sup> | 0.101                    | (0.003;0.199)  | 0.043   | -0.168               | (-0.312;-0.024) | 0.023                  | 74.821        | 0.046                  | 42.244       | 0.188   | 91.183   | 7.577x10 <sup>-4</sup> |
| <b>LPC a C18:2</b> | -0.509               | (-0.605;-0.412)                 | 4.382x10 <sup>-25</sup> | 0.063                    | (-0.044;0.170) | 0.249   | -0.331               | (-0.518;-0.145) | 4.998x10 <sup>-4</sup> | 0.000         | 0.332                  | 0.000        | 0.399   | 92.415   | 2.825x10 <sup>-4</sup> |
| <b>LPC a C20:4</b> | -0.251               | (-0.326;-0.176)                 | 5.374x10 <sup>-11</sup> | 0.049                    | (-0.048;0.145) | 0.323   | -0.202               | (-0.366;-0.038) | 0.016                  | 64.930        | 0.091                  | 0.000        | 0.408   | 83.501   | 0.014                  |
| <b>LPC a C26:0</b> | 0.173                | (0.087;0.260)                   | 8.871x10 <sup>-5</sup>  | 0.016                    | (-0.080;0.111) | 0.747   | 0.278                | (0.143;0.413)   | 5.288x10 <sup>-5</sup> | 0.000         | 0.827                  | 0.000        | 0.970   | 55.113   | 0.136                  |
| <b>PC aa C30:0</b> | 0.348                | (0.242;0.453)                   | 9.789x10 <sup>-11</sup> | 0.138                    | (-0.003;0.279) | 0.055   | 0.280                | (0.078;0.481)   | 0.007                  | 92.924        | 1.704x10 <sup>-4</sup> | 40.316       | 0.196   | 0.000    | 0.525                  |
| <b>PC aa C32:0</b> | 0.157                | (0.090;0.224)                   | 4.643x10 <sup>-6</sup>  | 0.044                    | (-0.039;0.128) | 0.297   | 0.121                | (0.009;0.233)   | 0.034                  | 47.468        | 0.168                  | 52.866       | 0.145   | 0.000    | 0.680                  |
| <b>PC aa C32:1</b> | 0.601                | (0.452;0.749)                   | 2.503x10 <sup>-15</sup> | 0.197                    | (0.032;0.362)  | 0.020   | 0.431                | (0.130;0.731)   | 0.005                  | 81.324        | 0.021                  | 0.000        | 0.404   | 0.000    | 0.419                  |
| <b>PC aa C32:2</b> | 0.339                | (0.230;0.447)                   | 9.435x10 <sup>-10</sup> | 0.060                    | (-0.078;0.197) | 0.393   | 0.291                | (0.032;0.550)   | 0.027                  | 51.125        | 0.153                  | 0.000        | 0.714   | 0.000    | 0.804                  |
| <b>PC aa C34:1</b> | 0.258                | (0.189;0.327)                   | 3.131x10 <sup>-13</sup> | 0.080                    | (-0.006;0.166) | 0.070   | 0.241                | (0.056;0.427)   | 0.011                  | 64.966        | 0.091                  | 9.510        | 0.293   | 0.000    | 0.842                  |
| <b>PC aa C34:2</b> | 0.198                | (0.143;0.254)                   | 2.183x10 <sup>-12</sup> | 0.011                    | (-0.057;0.079) | 0.744   | 0.099                | (-0.044;0.242)  | 0.176                  | 79.982        | 0.025                  | 60.910       | 0.110   | 0.000    | 0.450                  |
| <b>PC aa C34:3</b> | 0.351                | (0.257;0.445)                   | 2.080x10 <sup>-13</sup> | 0.146                    | (0.027;0.264)  | 0.016   | 0.206                | (0.011;0.400)   | 0.038                  | 87.204        | 0.005                  | 65.364       | 0.089   | 0.000    | 0.811                  |

|                    |       |               |                         |        |                |       |       |               |                        |        |       |        |       |       |       |
|--------------------|-------|---------------|-------------------------|--------|----------------|-------|-------|---------------|------------------------|--------|-------|--------|-------|-------|-------|
| <b>PC aa C34:4</b> | 0.527 | (0.408;0.647) | 5.027x10 <sup>-18</sup> | 0.150  | (0.006;0.295)  | 0.042 | 0.437 | (0.171;0.704) | 0.001                  | 82.887 | 0.016 | 12.203 | 0.286 | 0.000 | 0.992 |
| <b>PC aa C36:3</b> | 0.308 | (0.236;0.380) | 7.124x10 <sup>-17</sup> | 0.024  | (-0.064;0.113) | 0.589 | 0.206 | (0.046;0.365) | 0.011                  | 13.600 | 0.282 | 0.000  | 0.468 | 0.000 | 0.421 |
| <b>PC aa C36:4</b> | 0.326 | (0.252;0.401) | 8.596x10 <sup>-18</sup> | -0.012 | (-0.105;0.081) | 0.797 | 0.191 | (0.047;0.334) | 0.009                  | 0.000  | 0.407 | 23.784 | 0.252 | 0.000 | 0.496 |
| <b>PC aa C36:6</b> | 0.382 | (0.265;0.500) | 1.836x10 <sup>-10</sup> | 0.147  | (0.007;0.288)  | 0.040 | 0.438 | (0.242;0.634) | 1.169x10 <sup>-5</sup> | 82.018 | 0.018 | 40.282 | 0.196 | 0.000 | 0.787 |
| <b>PC aa C38:6</b> | 0.239 | (0.146;0.332) | 5.025x10 <sup>-7</sup>  | -0.004 | (-0.110;0.101) | 0.935 | 0.357 | (0.207;0.507) | 3.026x10 <sup>-6</sup> | 15.924 | 0.275 | 59.983 | 0.114 | 0.000 | 0.465 |
| <b>PC ae C42:0</b> | 0.141 | (0.086;0.196) | 5.339x10 <sup>-7</sup>  | -0.032 | (-0.105;0.041) | 0.385 | 0.117 | (0.033;0.201) | 0.006                  | 0.000  | 0.430 | 0.000  | 0.463 | 0.000 | 0.886 |
| <b>SM C20:2</b>    | 0.220 | (0.119;0.320) | 1.865x10 <sup>-5</sup>  | 0.021  | (-0.093;0.134) | 0.718 | 0.320 | (0.140;0.501) | 5.067x10 <sup>-4</sup> | 52.501 | 0.147 | 0.000  | 0.619 | 0.000 | 0.990 |

Analyses adjusted for age, time of blood sampling, fasting time (RCS), waist circumference, white blood cell count, red blood cell count, thrombocytes count, and cystatin C concentrations. OC non-users without menstrual bleeding at the time of assessment used as the reference group (N = 219).

Metabolites presented if the effect of OC use was Bonferroni-corrected significant (171 tests:  $p < 2.924 \times 10^{-4}$ ) in SHIP-TREND. Italics = meta-analytic effect not significant in any of the three groups.

**Table S8.** Mediating effects of cortisol in women without menstrual bleeding at the time of assessment.

|                    | SHIP-TREND (N = 190) |                 |         | SHIP-2 (N = 128) |                                  |         | Meta-analysis |                 |         |            |                  |         | Heterogeneity |                        |            |         |
|--------------------|----------------------|-----------------|---------|------------------|----------------------------------|---------|---------------|-----------------|---------|------------|------------------|---------|---------------|------------------------|------------|---------|
|                    | ind. effect          | 95%-CI          | p-value | ind. effect      | 95%-CI                           | p-value | ind. effect   | 95%-CI          | p-value | % mediated | 95%-CI           | p-value | ind. effect   | p-value                | % mediated | p-value |
| <b>Carnitine</b>   | -0.090               | (-0.166;-0.015) | 0.019   | -0.007           | (-0.069;0.055)                   | 0.817   | -0.041        | (-0.089;0.007)  | 0.095   | 52.1       | (-5.417;109.636) | 0.076   | 63.990        | 0.096                  | 0.0        | 0.929   |
| <b>Citrulline</b>  | -0.025               | (-0.125;0.075)  | 0.624   | -0.025           | (-0.116;0.066)                   | 0.592   | -0.025        | (-0.092;0.042)  | 0.468   | 7.4        | (-23.850;38.567) | 0.644   | 0.000         | 0.999                  | 0.0        | 0.977   |
| <b>Glutamine</b>   | -0.055               | (-0.124;0.014)  | 0.116   | 0.009            | (-0.041;0.059)                   | 0.728   | -0.013        | (-0.054;0.027)  | 0.522   | 7.6        | (-12.925;28.215) | 0.466   | 54.107        | 0.140                  | 39.7       | 0.198   |
| <b>Glycine</b>     | -0.195               | (-0.320;-0.069) | 0.002   | -0.065           | (-0.190;0.061)                   | 0.311   | -0.130        | (-0.218;-0.041) | 0.004   | 22.6       | (2.091;43.074)   | 0.031   | 51.645        | 0.150                  | 56.0       | 0.132   |
| <b>Ornithine</b>   | -0.125               | (-0.216;-0.035) | 0.007   | -0.038           | (-0.148;0.072)                   | 0.499   | -0.090        | (-0.160;-0.020) | 0.012   | 23.4       | (4.208;42.553)   | 0.017   | 31.041        | 0.229                  | 0.0        | 0.584   |
| <b>Tyrosine</b>    | -0.134               | (-0.224;-0.044) | 0.004   | 0.101            | (0.002;0.199)                    | 0.045   | -0.027        | (-0.093;0.040)  | 0.427   | 10.8       | (-19.811;41.472) | 0.488   | 91.597        | 5.610x10 <sup>-4</sup> | 85.9       | 0.008   |
| <b>LPC a C17:0</b> | -0.049               | (-0.147;0.049)  | 0.327   | -0.134           | (-0.260;-0.008)                  | 0.037   | -0.081        | (-0.158;-0.004) | 0.040   | 24.1       | (0.555;47.641)   | 0.045   | 8.506         | 0.296                  | 0.0        | 0.746   |
| <b>LPC a C18:0</b> | -0.074               | (-0.170;0.021)  | 0.128   | -0.100           | (-0.201;5.912x10 <sup>-4</sup> ) | 0.051   | -0.087        | (-0.156;-0.017) | 0.014   | 18.6       | (2.409;34.715)   | 0.024   | 0.000         | 0.715                  | 0.0        | 0.866   |
| <b>LPC a C18:1</b> | -0.046               | (-0.141;0.048)  | 0.335   | -0.097           | (-0.197;0.003)                   | 0.058   | -0.070        | (-0.139;-0.001) | 0.045   | 17.2       | (0.069;34.421)   | 0.049   | 0.000         | 0.473                  | 0.0        | 0.847   |
| <b>LPC a C18:2</b> | -0.123               | (-0.229;-0.017) | 0.023   | -0.117           | (-0.228;-0.006)                  | 0.040   | -0.120        | (-0.197;-0.043) | 0.002   | 22.0       | (6.412;37.590)   | 0.006   | 0.000         | 0.941                  | 0.0        | 0.650   |
| <b>LPC a C20:4</b> | 0.043                | (-0.054;0.140)  | 0.386   | -0.075           | (-0.165;0.016)                   | 0.107   | -0.020        | (-0.086;0.046)  | 0.557   | 14.3       | (-11.157;39.750) | 0.271   | 66.745        | 0.083                  | 36.7       | 0.209   |

|                    |       |                                 |                        |       |                |                        |       |                |                        |      |                    |                        |        |       |      |       |
|--------------------|-------|---------------------------------|------------------------|-------|----------------|------------------------|-------|----------------|------------------------|------|--------------------|------------------------|--------|-------|------|-------|
| <b>LPC a C26:0</b> | 0.066 | (-0.044;0.175)                  | 0.239                  | 0.092 | (-0.001;0.185) | 0.053                  | 0.081 | (0.010;0.152)  | 0.025                  | 35.2 | (-107.320;177.630) | 0.629                  | 0.000  | 0.723 | 0.0  | 0.960 |
| <b>PC aa C32:0</b> | 0.116 | (0.021;0.211)                   | 0.016                  | 0.050 | (-0.022;0.123) | 0.172                  | 0.075 | (0.017;0.132)  | 0.011                  | 55.0 | (-4.934;114.833)   | 0.072                  | 14.195 | 0.280 | 0.0  | 0.988 |
| <b>PC aa C32:1</b> | 0.139 | (-0.019;0.296)                  | 0.085                  | 0.333 | (0.135;0.531)  | 9.631x10 <sup>-4</sup> | 0.214 | (0.091;0.338)  | 6.666x10 <sup>-4</sup> | 18.9 | (-4.395;42.185)    | 0.112                  | 56.039 | 0.131 | 0.0  | 0.869 |
| <b>PC aa C32:2</b> | 0.020 | (-0.096;0.135)                  | 0.737                  | 0.128 | (0.002;0.253)  | 0.046                  | 0.069 | (-0.016;0.154) | 0.111                  | 9.2  | (-18.960;37.276)   | 0.523                  | 34.941 | 0.215 | 0.0  | 0.369 |
| <b>PC aa C34:1</b> | 0.123 | (0.029;0.216)                   | 0.010                  | 0.086 | (0.021;0.150)  | 0.009                  | 0.098 | (0.045;0.151)  | 3.136x10 <sup>-4</sup> | 40.1 | (13.387;66.814)    | 0.003                  | 0.000  | 0.522 | 0.0  | 0.851 |
| <b>PC aa C34:2</b> | 0.100 | (0.023;0.177)                   | 0.011                  | 0.043 | (-0.009;0.096) | 0.104                  | 0.061 | (0.018;0.104)  | 0.006                  | 34.7 | (6.933;62.501)     | 0.014                  | 30.224 | 0.231 | 0.0  | 0.874 |
| <b>PC aa C34:3</b> | 0.131 | (0.035;0.226)                   | 0.007                  | 0.133 | (0.014;0.252)  | 0.029                  | 0.131 | (0.057;0.206)  | 5.357x10 <sup>-4</sup> | 28.4 | (4.843;51.991)     | 0.018                  | 0.000  | 0.979 | 0.0  | 0.924 |
| <b>PC aa C34:4</b> | 0.200 | (0.062;0.337)                   | 0.004                  | 0.175 | (0.028;0.322)  | 0.020                  | 0.188 | (0.088;0.289)  | 2.466x10 <sup>-4</sup> | 30.7 | (7.620;53.853)     | 0.009                  | 0.000  | 0.812 | 0.0  | 0.913 |
| <b>PC aa C36:3</b> | 0.172 | (0.081;0.262)                   | 2.032x10 <sup>-4</sup> | 0.110 | (0.037;0.182)  | 0.003                  | 0.134 | (0.077;0.190)  | 3.405x10 <sup>-6</sup> | 45.1 | (22.856;67.394)    | 7.137x10 <sup>-5</sup> | 9.413  | 0.293 | 0.0  | 0.694 |
| <b>PC aa C36:4</b> | 0.208 | (0.099;0.316)                   | 1.706x10 <sup>-4</sup> | 0.101 | (0.033;0.170)  | 0.004                  | 0.132 | (0.074;0.189)  | 7.876x10 <sup>-6</sup> | 41.3 | (21.771;60.843)    | 3.412x10 <sup>-5</sup> | 62.235 | 0.104 | 21.1 | 0.260 |
| <b>PC aa C38:6</b> | 0.108 | (0.003;0.214)                   | 0.044                  | 0.098 | (-0.014;0.210) | 0.086                  | 0.104 | (0.027;0.180)  | 0.008                  | 37.8 | (-4.804;80.332)    | 0.082                  | 0.000  | 0.899 | 0.0  | 0.979 |
| <b>PC ae C42:0</b> | 0.124 | (0.059;0.189)                   | 1.850x10 <sup>-4</sup> | 0.057 | (0.009;0.105)  | 0.020                  | 0.081 | (0.042;0.119)  | 4.226x10 <sup>-5</sup> | 70.8 | (16.779;124.910)   | 0.010                  | 62.361 | 0.103 | 0.0  | 0.723 |
| <b>SM C20:2</b>    | 0.109 | (3.617x10 <sup>-4</sup> ;0.218) | 0.049                  | 0.124 | (0.011;0.237)  | 0.031                  | 0.117 | (0.038;0.195)  | 0.004                  | 36.1 | (-6.289;78.519)    | 0.095                  | 0.000  | 0.853 | 0.0  | 0.951 |

Analyses adjusted for age, time of blood sampling, fasting time (RCS), waist circumference, white blood cell count, red blood cell count, thrombocytes count, and cystatin C concentrations.

Metabolites presented if the effect of OC use was Bonferroni-corrected significant (171 tests:  $p < 2.924 \times 10^{-4}$ ) in SHIP-TREND. LPC a C14:0, PC aa C30:0, and PC aa C36:6 missing due to non-significant associations between these metabolite concentrations and cortisol in SHIP-2. Italics = significant indirect effect in meta-analysis after Bonferroni-correction for mediation analyses (24 tests.  $p < 0.002$ )
